# Supplementary material for: The Hot-Hand Fallacy: Cognitive Mistakes or Equilibrium Adjustments? Evidence from Major League Baseball
Source: Atypon-hosted journal article supplement (doi:10.1287/mnsc.2017.2804), 2017-09-15
Supplement: mnsc.2017.2804-sm.pdf [file mnsc.2017.2804-sm.pdf]

Online Appendix for  
THE HOT HAND FALLACY: COGNITIVE MISTAKES OR EQUILIBRIUM  
ADJUSTMENTS? EVIDENCE FROM MAJOR LEAGUE BASEBALL

Brett Green\*      Jeffrey Zwiebel†

This appendix reports results of additional tests that are mentioned but not included in the main text of Green and Zwiebel (2017). All references in table captions are to Green and Zwiebel (2017).

---

\*Haas School of Business, University of California, Berkeley, CA 94720, email: [greenb@berkeley.edu](mailto:greenb@berkeley.edu), webpage: <http://faculty.haas.berkeley.edu/bgreen/>

†Graduate School of Business, Stanford University, Stanford, CA 94305, email: [zwiebel@stanford.edu](mailto:zwiebel@stanford.edu)

|                 | (1)                    | (2)                    | (3)                     | (4)                    | (5)                    |
|-----------------|------------------------|------------------------|-------------------------|------------------------|------------------------|
|                 | Hit                    | Hr                     | Strikeout               | OnBase                 | Walk                   |
| state           | 0.0525***<br>(8.15)    | 0.0991***<br>(15.96)   | 0.127***<br>(19.74)     | 0.0876***<br>(15.01)   | 0.150***<br>(25.90)    |
| batter_ability  | 0.363***<br>(16.06)    | 0.682***<br>(48.93)    | 0.759***<br>(74.40)     | 0.536***<br>(22.27)    | 0.654***<br>(39.30)    |
| pitcher_ability | 0.533***<br>(33.53)    | 0.377***<br>(20.34)    | 0.822***<br>(64.30)     | 0.602***<br>(44.61)    | 0.792***<br>(59.15)    |
| samehand        | -0.0135***<br>(-12.47) | -0.00454***<br>(-8.95) | 0.0177***<br>(17.67)    | -0.0246***<br>(-19.75) | -0.0161***<br>(-19.05) |
| batter_home     | 0.00914***<br>(10.72)  | 0.00207***<br>(5.27)   | -0.00834***<br>(-11.20) | 0.0136***<br>(16.44)   | 0.00680***<br>(13.06)  |
| Observations    | 1154102                | 1154102                | 1154102                 | 1400748                | 1400748                |

*t* statistics in parentheses

\*  $p < 0.05$ , \*\*  $p < 0.01$ , \*\*\*  $p < 0.001$

**Table B.1 – Longer history lengths (Batters).** This table reports the results for the same regressions as given in Columns (1) of Table A.5 across all 5 statistics except using alternative history lengths of  $L=40$  to measure the batter’s current state as given by equation (3). All regressions include stadium  $\times$  year dummy control variables.

|                 | (1)<br>Hit             | (2)<br>Hr              | (3)<br>Strikeout        | (4)<br>OnBase          | (5)<br>Walk            |
|-----------------|------------------------|------------------------|-------------------------|------------------------|------------------------|
| state           | 0.0104**<br>(3.17)     | 0.0324***<br>(9.76)    | 0.0347***<br>(11.15)    | 0.0347***<br>(11.82)   | 0.0567***<br>(19.07)   |
| batter_ability  | 0.376***<br>(15.98)    | 0.733***<br>(52.82)    | 0.838***<br>(89.40)     | 0.564***<br>(21.80)    | 0.727***<br>(38.85)    |
| pitcher_ability | 0.533***<br>(33.53)    | 0.377***<br>(20.34)    | 0.822***<br>(64.35)     | 0.601***<br>(44.54)    | 0.791***<br>(58.95)    |
| samehand        | -0.0134***<br>(-12.28) | -0.00448***<br>(-8.69) | 0.0177***<br>(17.54)    | -0.0247***<br>(-19.56) | -0.0163***<br>(-18.95) |
| batter_home     | 0.00905***<br>(10.69)  | 0.00201***<br>(5.23)   | -0.00815***<br>(-11.20) | 0.0133***<br>(16.48)   | 0.00660***<br>(13.13)  |
| Observations    | 1154102                | 1154102                | 1154102                 | 1400748                | 1400748                |

*t* statistics in parentheses

\*  $p < 0.05$ , \*\*  $p < 0.01$ , \*\*\*  $p < 0.001$

**Table B.2 – Shorter history lengths (Batters).** This table reports the results for the same regressions as given in Columns (1) of Table A.5 across all five statistics except using alternative history lengths of  $L=10$  to measure the batter’s current state as given by equation (3). All regressions include stadium  $\times$  year dummy control variables.

|                 | (1)<br>Hit             | (2)<br>Hr              | (3)<br>Strikeout     | (4)<br>OnBase          | (5)<br>Walk             |
|-----------------|------------------------|------------------------|----------------------|------------------------|-------------------------|
| state           | 0.0612***<br>(9.79)    | 0.0460***<br>(7.44)    | 0.139***<br>(21.68)  | 0.0883***<br>(15.04)   | 0.0661***<br>(10.62)    |
| pitcher_ability | 0.380***<br>(16.23)    | 0.267***<br>(11.52)    | 0.704***<br>(56.66)  | 0.429***<br>(19.43)    | 0.656***<br>(43.68)     |
| batter_ability  | 0.562***<br>(49.15)    | 0.717***<br>(66.16)    | 0.831***<br>(80.94)  | 0.623***<br>(62.43)    | 0.629***<br>(66.39)     |
| samehand        | -0.0132***<br>(-10.44) | -0.00401***<br>(-8.62) | 0.0182***<br>(10.05) | -0.0222***<br>(-17.45) | -0.0137***<br>(-18.28)  |
| pitcher_home    | -0.00865***<br>(-9.60) | -0.00151***<br>(-4.33) | 0.00842***<br>(9.88) | -0.0117***<br>(-13.62) | -0.00533***<br>(-10.35) |
| Observations    | 1095673                | 1095673                | 1095673              | 1297611                | 1297611                 |

*t* statistics in parentheses

\*  $p < 0.05$ , \*\*  $p < 0.01$ , \*\*\*  $p < 0.001$

**Table B.3 – Longer history lengths (Pitchers).** This table reports the results for the same regressions as given in Columns (1) of Table A.6 across all five statistics except using alternative history lengths of  $L=40$  to measure the pitchers’s current state as given by equation (3). All regressions include stadium  $\times$  year dummy control variables.

|                 | (1)<br>Hit             | (2)<br>Hr              | (3)<br>Strikeout     | (4)<br>OnBase          | (5)<br>Walk             |
|-----------------|------------------------|------------------------|----------------------|------------------------|-------------------------|
| state           | 0.0289***<br>(9.68)    | 0.0182***<br>(5.76)    | 0.0639***<br>(18.08) | 0.0459***<br>(16.67)   | 0.0148***<br>(4.79)     |
| pitcher_ability | 0.393***<br>(16.27)    | 0.274***<br>(11.62)    | 0.767***<br>(60.96)  | 0.447***<br>(19.38)    | 0.691***<br>(45.14)     |
| batter_ability  | 0.562***<br>(49.16)    | 0.716***<br>(66.20)    | 0.830***<br>(81.03)  | 0.622***<br>(62.42)    | 0.629***<br>(66.39)     |
| samehand        | -0.0131***<br>(-10.39) | -0.00401***<br>(-8.59) | 0.0182***<br>(10.03) | -0.0222***<br>(-17.40) | -0.0137***<br>(-18.23)  |
| pitcher_home    | -0.00857***<br>(-9.61) | -0.00150***<br>(-4.31) | 0.00829***<br>(9.98) | -0.0115***<br>(-13.62) | -0.00533***<br>(-10.32) |
| Observations    | 1095673                | 1095673                | 1095673              | 1297611                | 1297611                 |

*t* statistics in parentheses

\*  $p < 0.05$ , \*\*  $p < 0.01$ , \*\*\*  $p < 0.001$

**Table B.4 – Shorter history lengths (Pitchers).** This table reports the results for the same regressions as given in Columns (1) of Table A.6 across all five statistics except using alternative history lengths of  $L=10$  to measure the pitchers’s current state as given by equation (3). All regressions include stadium  $\times$  year dummy control variables.

|                     | (1)<br>Hit             | (2)<br>Hr               | (3)<br>Strikeout       | (4)<br>OnBase          | (5)<br>Walk            | (6)<br>WalkEx          |
|---------------------|------------------------|-------------------------|------------------------|------------------------|------------------------|------------------------|
| state               | 0.00522<br>(0.95)      | 0.0439***<br>(8.10)     | 0.0622***<br>(10.82)   | 0.0408***<br>(8.50)    | 0.0909***<br>(16.22)   | 0.0866***<br>(15.70)   |
| pitcher_ability     | 0.525***<br>(31.18)    | 0.393***<br>(19.01)     | 0.797***<br>(51.60)    | 0.587***<br>(43.41)    | 0.796***<br>(53.23)    | 0.795***<br>(53.26)    |
| samehand            | -0.0182***<br>(-13.18) | -0.00777***<br>(-11.77) | 0.0243***<br>(16.02)   | -0.0333***<br>(-20.98) | -0.0233***<br>(-18.76) | -0.0234***<br>(-18.83) |
| batter_home         | 0.00939***<br>(9.99)   | 0.00208***<br>(4.61)    | -0.00825***<br>(-9.74) | 0.0134***<br>(14.66)   | 0.00694***<br>(12.52)  | 0.00692***<br>(12.41)  |
| batter_state (hits) |                        |                         |                        |                        |                        | 0.00792*<br>(2.32)     |
| batter_state (hrs)  |                        |                         |                        |                        |                        | 0.0798***<br>(9.47)    |
| Observations        | 1045160                | 1045160                 | 1045160                | 1250826                | 1250826                | 1243403                |

*t* statistics in parentheses

\*  $p < 0.05$ , \*\*  $p < 0.01$ , \*\*\*  $p < 0.001$

**Table B.5 – Robustness: Measuring Ability using Batter Fixed Effects.** This table gives estimates for the batter regressions where fixed effects are used to control for batter ability. The dependent variable is listed directly under the column number. Each column gives the estimates from the OLS regression given in equation (6) and using the baseline measure of the batter’s state as estimated by equation (3). Column (6) includes the batter’s state in hit in home runs to capture the endogenous response of the defense. Batters with fewer than 2,500 attempts in the dataset were excluded from the regressions. Standard errors are clustered at the batter level. All regressions include stadium  $\times$  year dummy control variables.

|              | (1)<br>Prop10         | (2)<br>Prop2p5        | (3)<br>Add10          | (4)<br>Add2p5         | (5)<br>Dist10          | (6)<br>Dist2p5        |
|--------------|-----------------------|-----------------------|-----------------------|-----------------------|------------------------|-----------------------|
| hot          | 0.0128***<br>(8.74)   | 0.0186***<br>(6.93)   | 0.0132***<br>(9.34)   | 0.0181***<br>(6.43)   | 0.00870***<br>(6.04)   | 0.00753***<br>(3.51)  |
| cold         | -0.0111***<br>(-8.59) | -0.0147***<br>(-5.81) | -0.0112***<br>(-8.31) | -0.0158***<br>(-6.26) | -0.00990***<br>(-6.61) | -0.0143***<br>(-5.08) |
| Observations | 1489346               | 1489346               | 1489346               | 1489346               | 1399046                | 1399046               |

*t* statistics in parentheses

\*  $p < 0.05$ , \*\*  $p < 0.01$ , \*\*\*  $p < 0.001$

**Table B.6 – Robustness to thresholds. Dependent Variable: On Base (Batters).** This table reports the results for the same regressions as given in Columns (4)-(6) (additive, proportional and distribution based thresholds for hot and cold) except using 10% and 2.5% thresholds as an alternative to the 5% thresholds used in Table A.7. The same control variable were included in the regressions but the coefficients are omitted from the above table. All regressions include stadium  $\times$  year dummy control variables.

|                  | (1)<br>Prop10         | (2)<br>Prop2p5       | (3)<br>Add10          | (4)<br>Add2p5         | (5)<br>Dist10         | (6)<br>Dist2p5       |
|------------------|-----------------------|----------------------|-----------------------|-----------------------|-----------------------|----------------------|
| hot              | 0.00436**<br>(3.03)   | 0.0119***<br>(4.71)  | 0.00543***<br>(3.86)  | 0.0131***<br>(4.83)   | 0.00221<br>(1.45)     | 0.00522**<br>(2.64)  |
| cold             | -0.00476**<br>(-3.19) | -0.00719*<br>(-2.43) | -0.00437**<br>(-2.67) | -0.00858**<br>(-2.90) | -0.00489**<br>(-2.81) | -0.00634*<br>(-2.49) |
| Stadium Year FEs | Yes                   | Yes                  | Yes                   | Yes                   | Yes                   | Yes                  |
| Observations     | 1192266               | 1192266              | 1192266               | 1192266               | 1113087               | 1113087              |

*t* statistics in parentheses

\*  $p < 0.05$ , \*\*  $p < 0.01$ , \*\*\*  $p < 0.001$

**Table B.7 – Robustness to thresholds. Dependent Variable: Hits (Batters).** This table reports the results for the same regressions as given in Columns (4)-(6) (additive, proportional and distribution based thresholds for hot and cold) except using 10% and 2.5% thresholds as an alternative to the 5% thresholds used in Table A.5. The same control variable were included in the regressions but the coefficients are omitted from the above table. All regressions include stadium  $\times$  year dummy control variables.

## References

Green, B. and J. Zwiebel (2017). The hot hand fallacy: Cognitive mistakes or equilibrium adjustments? evidence from major league baseball. *Management Science* (forthcoming).
